# Supplementary material for: Formation Mechanism of Carbon-Supported Hollow PtNi Nanoparticles via One-Step Preparations for Use in the Oxygen Reduction Reaction
Source: MDPI journal article supplement (doi:10.3390/catal12050513), 2022-05-04
Supplement: s1 [file s1]

# Supplymentary Tables

Table. S1 Particle size of PtNi<sub>x</sub>/C

|                   | PtNi/C-H | PtNi <sub>2</sub> /C-H | PtNi <sub>3</sub> /C-H | PtNi <sub>3</sub> /C-S |
|-------------------|----------|------------------------|------------------------|------------------------|
| Average size (nm) | 8.0      | 10.7                   | 12.6                   | 6.9                    |

Table. S2 Lattice constant of PtNi<sub>x</sub>/C

|       | Pt/C   | PtNi/C-H | PtNi <sub>2</sub> /C-H | PtNi <sub>3</sub> /C-H | PtNi <sub>3</sub> /C-S |
|-------|--------|----------|------------------------|------------------------|------------------------|
| (111) | 3.92 Å | 3.87 Å   | 3.86 Å                 | 3.86 Å                 | 3.90 Å                 |
| (200) | 3.93 Å | 3.93 Å   | 3.89 Å                 | 3.88 Å                 | 3.89 Å                 |
| (220) | 3.94 Å | 3.89 Å   | 3.86 Å                 | 3.86 Å                 | 3.89 Å                 |

Table. S3 Electrochemical surface area, mass activity and specific activity of catalysts

| Sample<br>(@ 0.9V)        | EASA<br>(m <sup>2</sup> /g <sub>Pt</sub> ) | Mass activity<br>(A/mg <sub>Pt</sub> ) |
|---------------------------|--------------------------------------------|----------------------------------------|
| PtNi <sub>3</sub> /C-H AT | 48.8                                       | 0.684                                  |
| PtNi <sub>2</sub> /C-H AT | 44.6                                       | 0.573                                  |
| PtNi/C-H AT               | 39.9                                       | 0.485                                  |
| PtNi <sub>3</sub> /C-S AT | 23.8                                       | 0.292                                  |
| Pt/C commercial           | 70.7                                       | 0.227                                  |

Table. S4 EASA of commercial Pt/C and PtNi<sub>3</sub>/C-H AT at 0.9V(vs. RHE) after 10,000 cycle ADT

|                           | Initial                              | aft<br>10000 cycle                   | Decreasing<br>ratio (%) |
|---------------------------|--------------------------------------|--------------------------------------|-------------------------|
| Pt/C commercial           | 69.0 m <sup>2</sup> /g <sub>Pt</sub> | 48.2 m <sup>2</sup> /g <sub>Pt</sub> | 30.1                    |
| PtNi <sub>3</sub> /C-H AT | 49.3 m <sup>2</sup> /g <sub>Pt</sub> | 37.1 m <sup>2</sup> /g <sub>Pt</sub> | 24.7                    |

Table. S5 Mass activity of commercial Pt/C and PtNi<sub>3</sub>/C-H AT at 0.9V(vs. RHE) after 10,000 cycle ADT

|                           | Initial                  | aft<br>10000 cycle       | Decreasing<br>ratio (%) |
|---------------------------|--------------------------|--------------------------|-------------------------|
| Pt/C commercial           | 0.297 A/mg <sub>Pt</sub> | 0.176 A/mg <sub>Pt</sub> | 40.7                    |
| PtNi <sub>3</sub> /C-H AT | 0.679 A/mg <sub>Pt</sub> | 0.482 A/mg <sub>Pt</sub> | 29.0                    |

# Supplymentary Figures

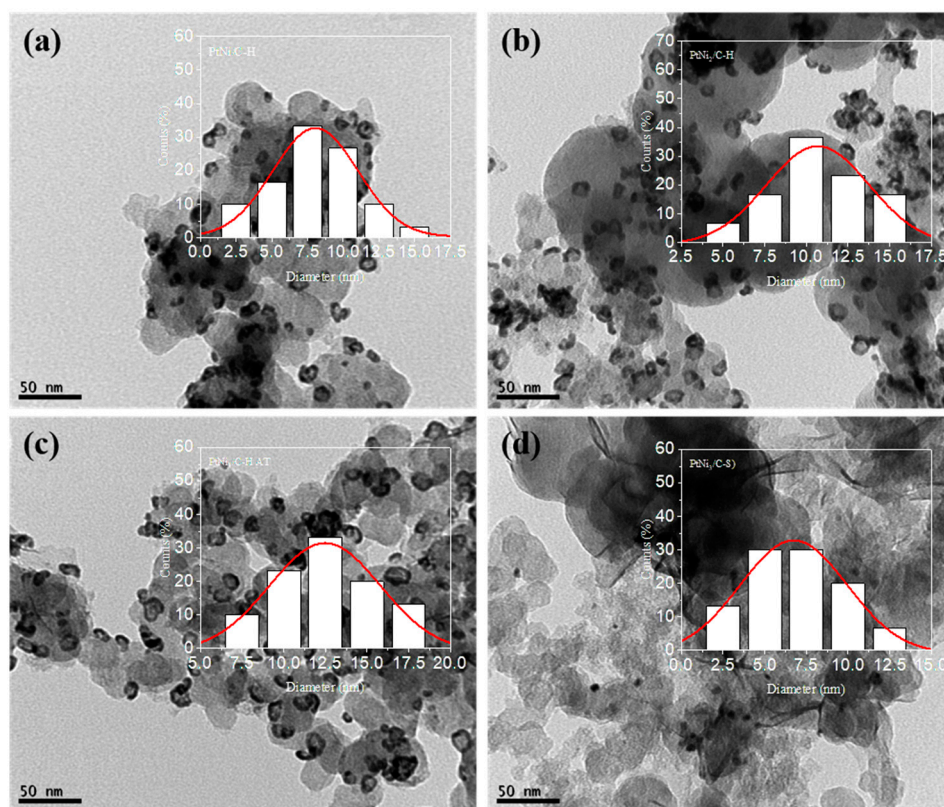

**Figure S1.** TEM images of (a) PtNi/C-H, (b) PtNi<sub>2</sub>/C-H, (c) PtNi<sub>3</sub>/C-H, (d) PtNi<sub>3</sub>/C-S

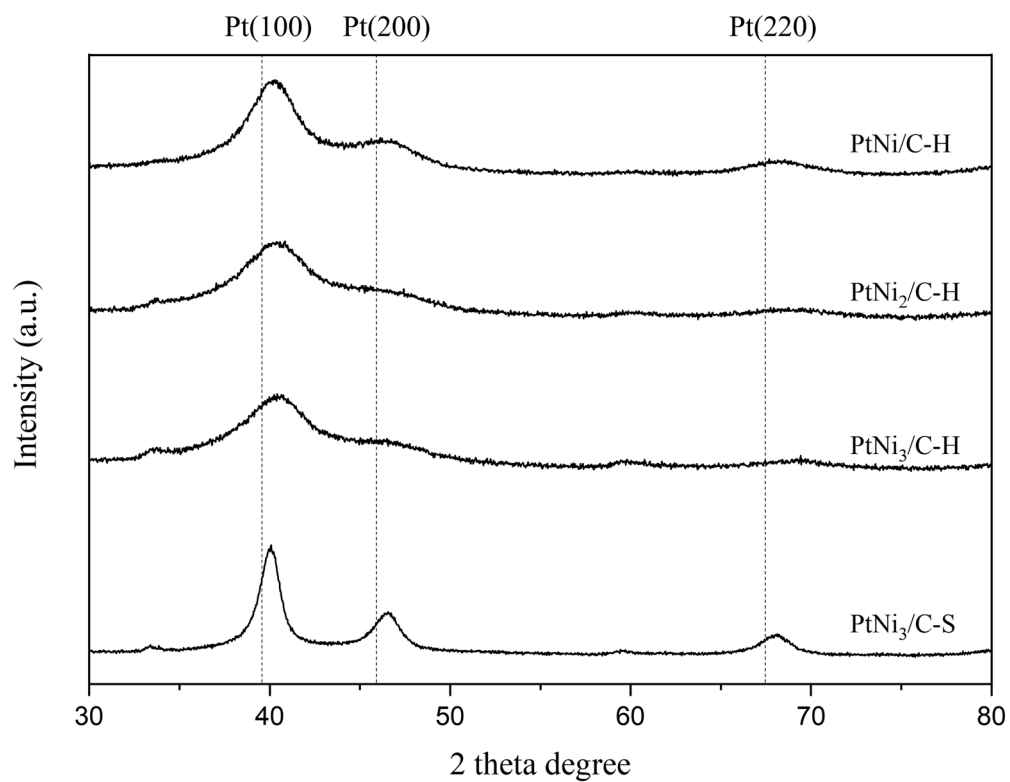

**Figure S2.** XRD pattern of PtNi<sub>x</sub>/C.

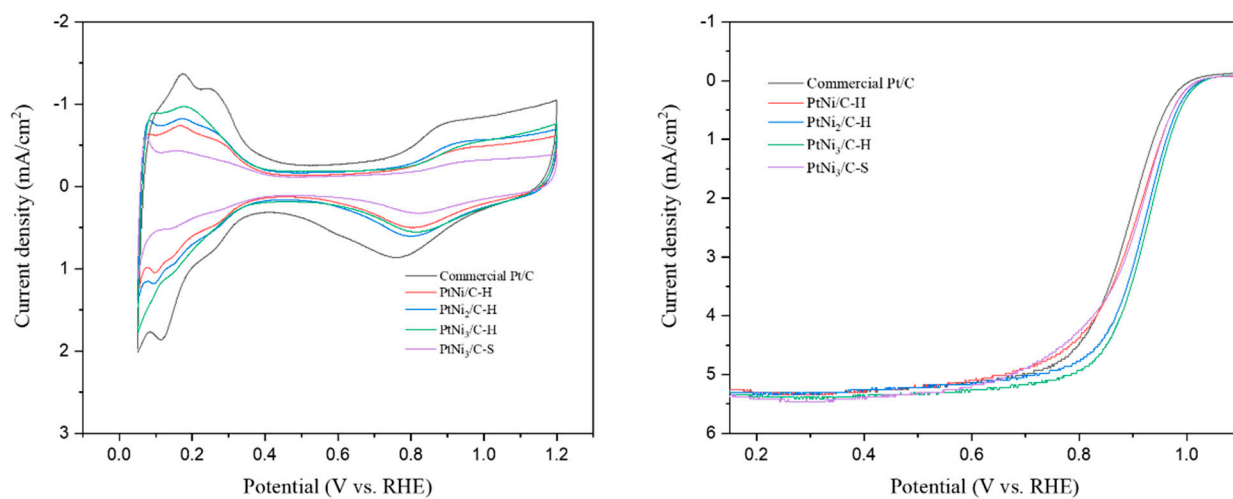

**Figure S3.** (a) CV and (b) ORR LSV of catalysts before acid treatment

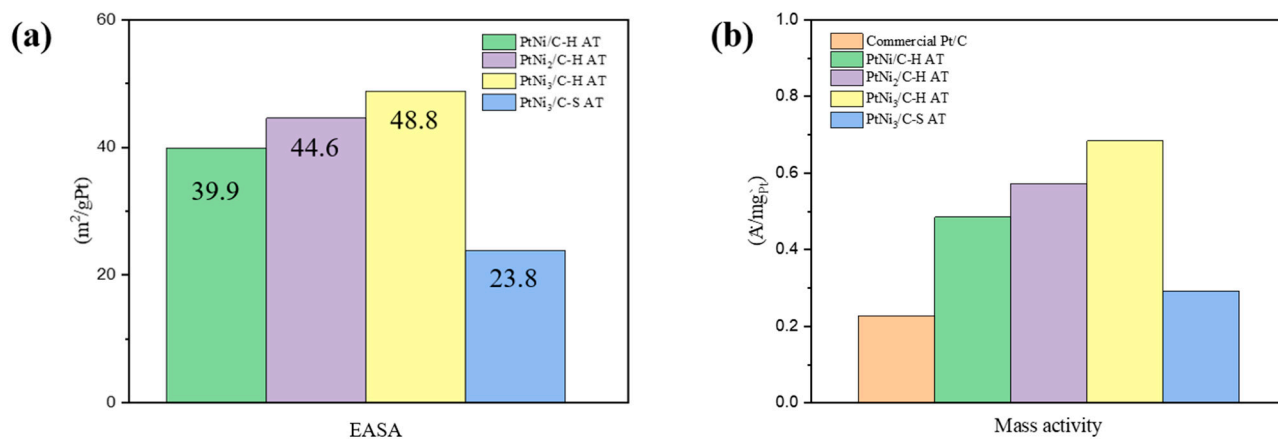

**Figure S4. (a) EASA and (b) ORR Mass activity of catalysts**

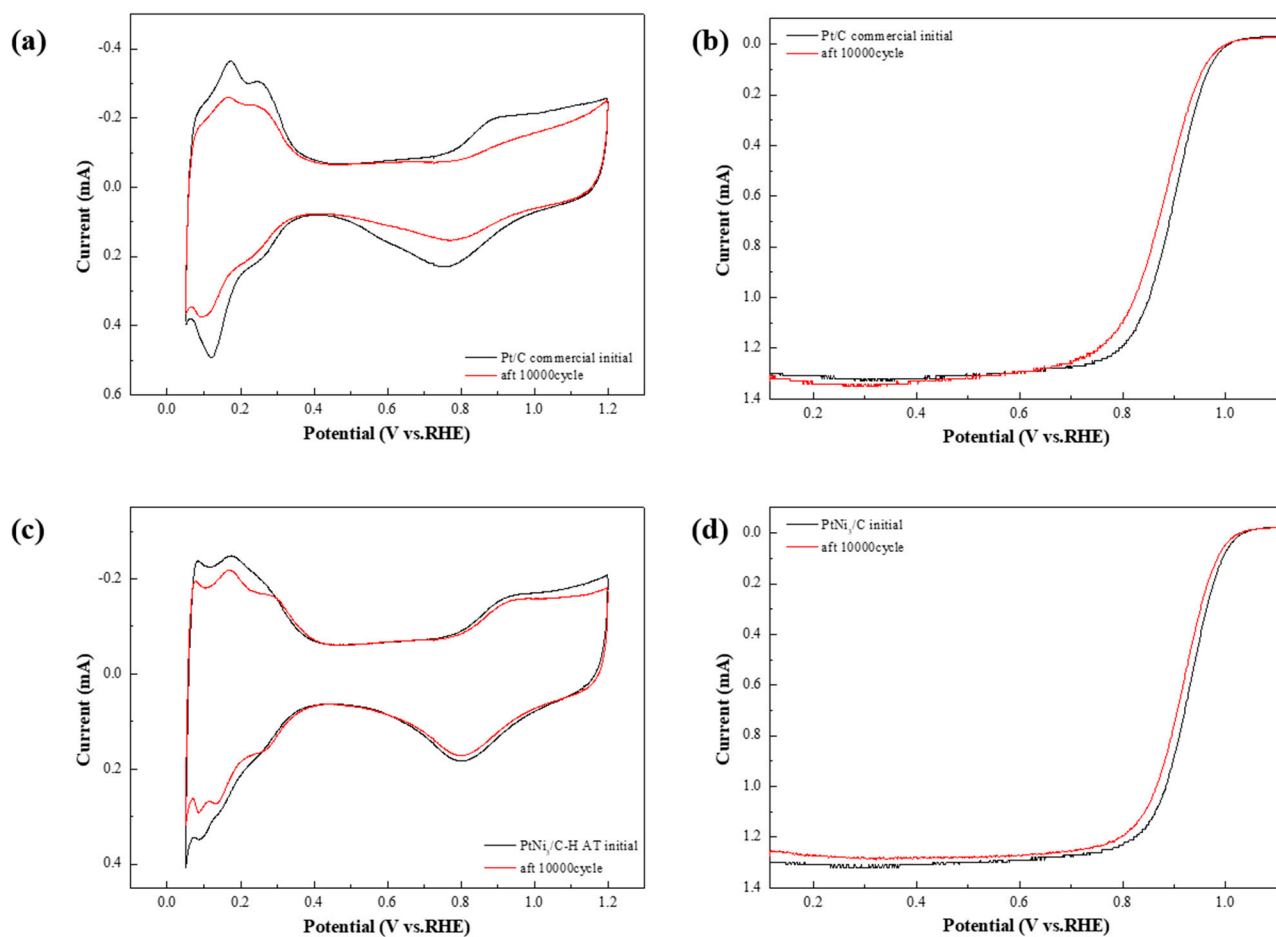

**Figure S5. (a,c) Cyclic voltammogram and (b,d) ORR LSV of commercial Pt/C, PtNi<sub>3</sub>/C-H AT before and after 10,000 cycles ADT**
